# Supplementary material
Source: publisher site journal article supplement (https://www.dovepress.com/get_supplementary_file.php?f=431862.docx)
Supplement: Supplementary file 1 [file get_supplementary_file.php]

**Supplementary**

ORIGINAL RESEARCH

Miele et al

**Figure S1.** DSC spectra (a) and TGA spectra (b) of pristine components: pullulan (PULL), chitosan (CHITO), citric acid (CA), hectorite (HEC), montmorillonite (MMT).
